# Supplementary material for: Structural mechanism of TRPV3 channel inhibition by the anesthetic dyclonine
Source: PubMed Central journal article supplement (PMC9120478; doi:10.1038/s41467-022-30537-8), 2022-05-19
Supplement: 41467_2022_30537_MOESM1_ESM.pdf [file 41467_2022_30537_MOESM1_ESM.pdf]

## Supplementary Information

### Structural mechanism of TRPV3 channel inhibition by the anesthetic dyclonine

Arthur Neuberger<sup>1</sup>, Kirill D Nadezhdin<sup>1</sup>, Alexander I Sobolevsky<sup>1,\*</sup>

<sup>1</sup>Department of Biochemistry and Molecular Biophysics, Columbia University, New York, NY, USA

\*Corresponding author. Tel: +1 2123054249; E-mail: [as4005@cumc.columbia.edu](mailto:as4005@cumc.columbia.edu)

#### **This PDF file includes:**

Supplementary Figures 1-2

Supplementary Table 1

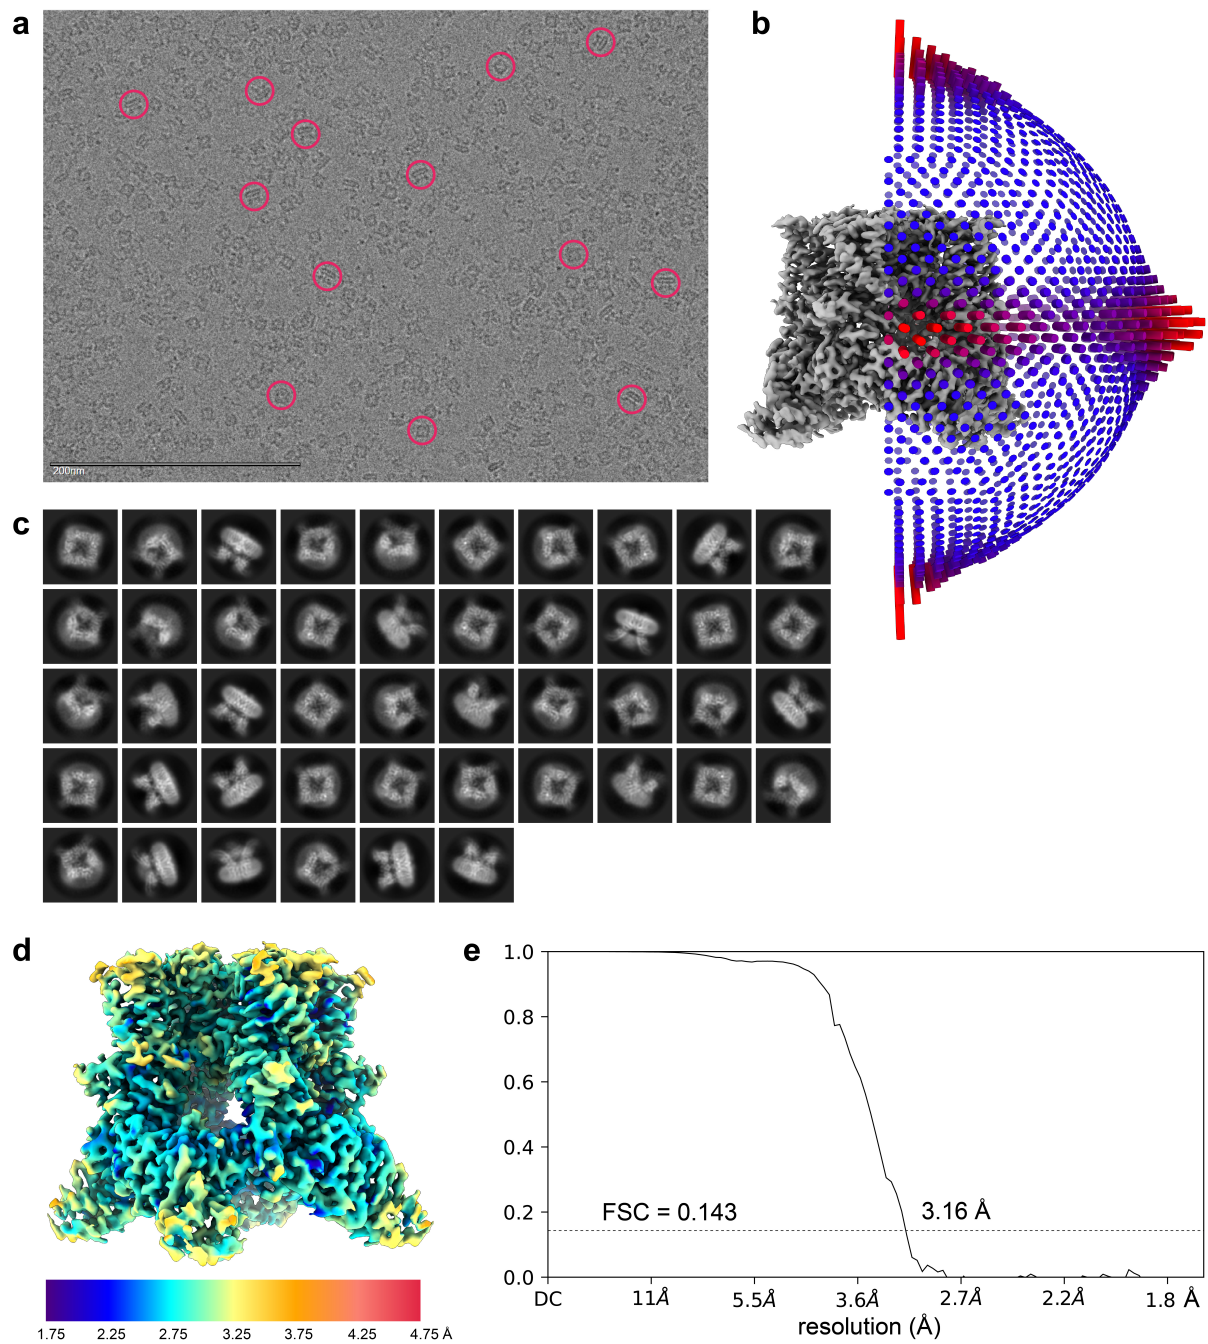

**Supplementary Fig. 1. Overview of cryo-EM data for TRPV3<sub>Dyc</sub>.** **a**, Representative micrograph with example particles circled in pink. **b**, Euler angle distribution of particles contributing to the final reconstruction with larger red cylinders representing orientations comprising more particles. **c**, Reference-free 2D class averages. **d**, Local resolution presented as coloring of the TRPV3<sub>Dyc</sub> cryo-EM map. **e**, FSC curve.

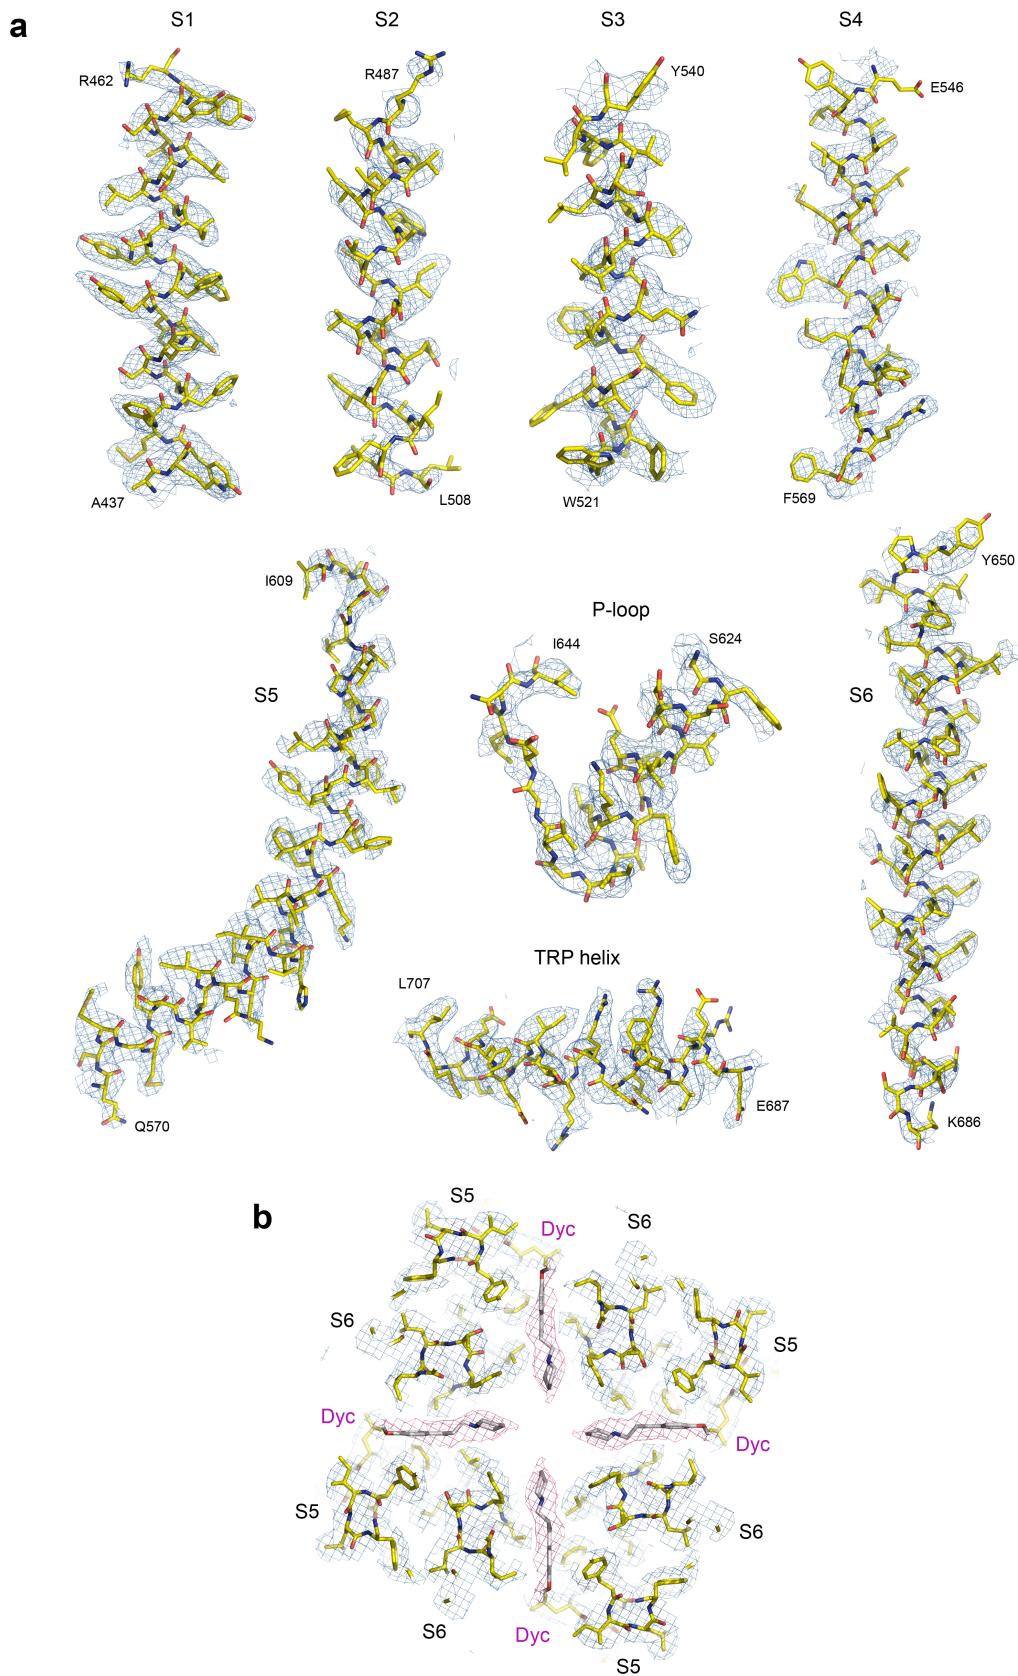

**Supplementary Fig. 2. Cryo-EM density of TRPV3<sub>Dyc</sub>.** **a**, Fragments of TRPV3<sub>Dyc</sub> cryo-EM map (blue mesh) for the membrane segments and TRP helix. **b**, The central slice of the map at the plane of dyclonine molecules. Density that corresponds to dyclonine molecules is shown as pink mesh.

**Supplementary Table 1. Cryo-EM data collection, refinement and validation statistics**

|                                                     |                      |
|-----------------------------------------------------|----------------------|
| <b>Structure</b>                                    | TRPV3 <sub>Dyc</sub> |
| EMDB accession code                                 | EMD-26488            |
| PDB accession code                                  | 7UGG                 |
| <b>Data collection and processing</b>               |                      |
| Magnification                                       | 105,000x             |
| Voltage (kV)                                        | 300                  |
| Electron exposure (e <sup>-</sup> Å <sup>-2</sup> ) | 60                   |
| Defocus range (μm)                                  | -0.8 to -2.0         |
| Reported pixel size (Å)                             | 0.86                 |
| Exposures (no.)                                     | 6,856                |
| <b>Processing software</b>                          |                      |
| Platform software for particle picking              | cryoSPARC v3.1       |
| Motion correction                                   | cryoSPARC v3.1       |
| CTF estimation                                      | cryoSPARC v3.1       |
| Software for 2D/3D class. & refinements             | cryoSPARC v3.1       |
| Symmetry imposed                                    | C4                   |
| Initial particle images (no.)                       | 4,985,077            |
| Final particle images (no.)                         | 87,876               |
| Map resolution (Å)                                  | 3.16                 |
| FSC 0.143                                           |                      |
| <b>Refinement</b>                                   |                      |
| Initial models used (PDB code)                      | This study           |
| Model resolution (Å)                                | 3.16                 |
| FSC threshold                                       | 0.143                |
| Map sharpening <i>B</i> factor (Å <sup>2</sup> )    | -132.9               |
| <b>Model composition</b>                            |                      |
| Non-hydrogen atoms                                  | 21,670               |
| Protein residues                                    | 2480                 |
| Ligands                                             | 30                   |
| Water                                               | 124                  |
| <b><i>B</i> factors (Å<sup>2</sup>)</b>             |                      |
| Protein                                             | 63.11                |
| Ligands                                             | 17.75                |
| <b>R.m.s. deviations</b>                            |                      |
| Bond lengths (Å)                                    | 0.008                |
| Bond angles (°)                                     | 1.241                |
| <b>Validation</b>                                   |                      |
| MolProbity score                                    | 1.60                 |
| Clash score, all atoms                              | 3.36                 |
| Poor rotamers (%)                                   | 0.54                 |
| <b>Ramachandran plot</b>                            |                      |
| Favoured (%)                                        | 92.51                |
| Allowed (%)                                         | 7.17                 |
| Disallowed (%)                                      | 0.33                 |
